# Supplementary material for: 7.5% n–i–p Sb2Se3 solar cells with CuSCN as a hole-transport layer
Source: Royal Society of Chemistry journal article supplement (doi:10.1039/c9ta01773a), 2019-01-01
Supplement: c9ta01773a1.pdf [file c9ta01773a1.pdf]

## Supporting Information

### **7.5% n-i-p Sb<sub>2</sub>Se<sub>3</sub> solar cell with CuSCN as hole-transport layer**

*Kanghua Li<sup>†,+</sup>, Siyu Wang<sup>†,+</sup>, Chao Chen<sup>†</sup>, Rokas Kondrotas<sup>†</sup>, Manchen Hu<sup>†</sup>,  
Shuaicheng Lu<sup>†</sup>, Chong Wang<sup>†</sup>, Wei Chen<sup>†</sup>, Jiang Tang<sup>†,\*</sup>*

<sup>†</sup> Sargent Joint Research Center, Wuhan National Laboratory for Optoelectronics (WNLO) and School of Optical and Electronic Information, Huazhong University of Science and Technology, Wuhan 430074, Hubei, P. R. China

\*Corresponding Author.

E-mail address: [jtang@mail.hust.edu.cn](mailto:jtang@mail.hust.edu.cn). (Jiang Tang)

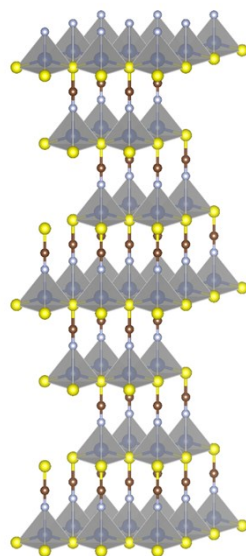

**Fig. S1** The crystal structure of CuSCN. Atoms are copper (blue), carbon (brown), sulfur (yellow) and nitrogen (grey).

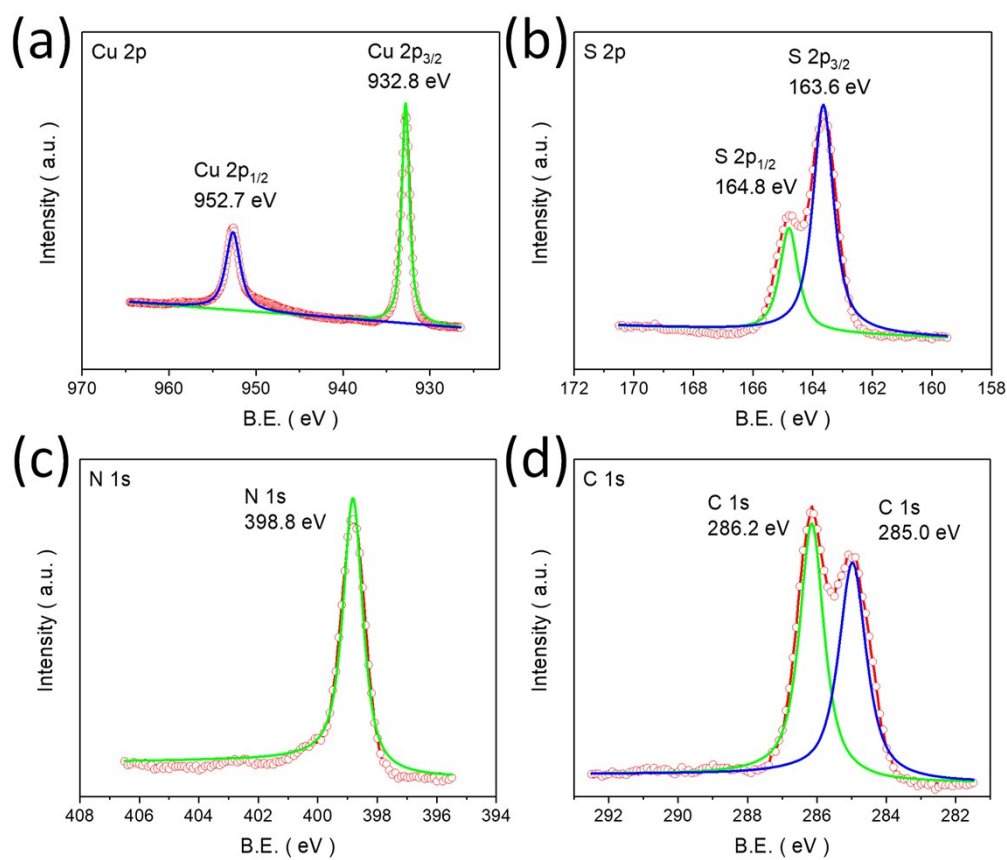

**Fig. S2** X-ray photoelectron spectra (XPS) of CuSCN films. Gaussian-Lorentzian fitting was applied to analyze the data.

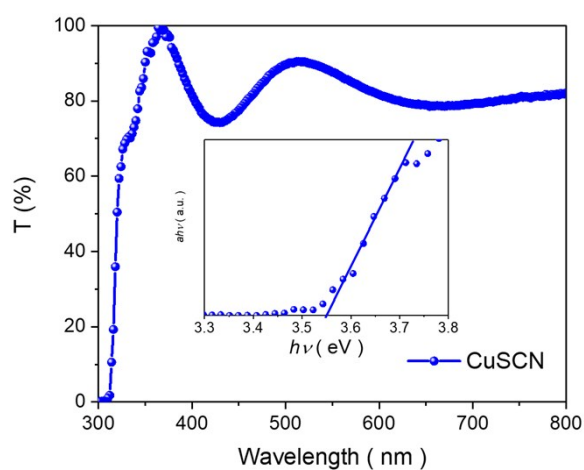

**Fig. S3** The transmission spectrum of CuSCN film on ITO conductive glass. Inset is the fitting result.

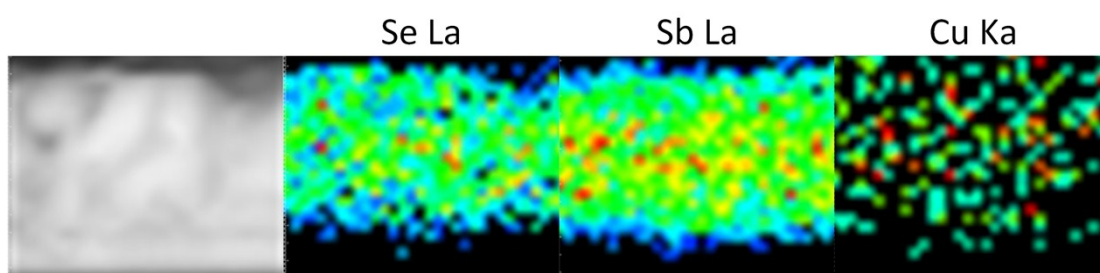

**Fig. S4** Cross-sectional Electron Probe Microscope analysis (EPMA) element mapping of the device with CuSCN HTL.

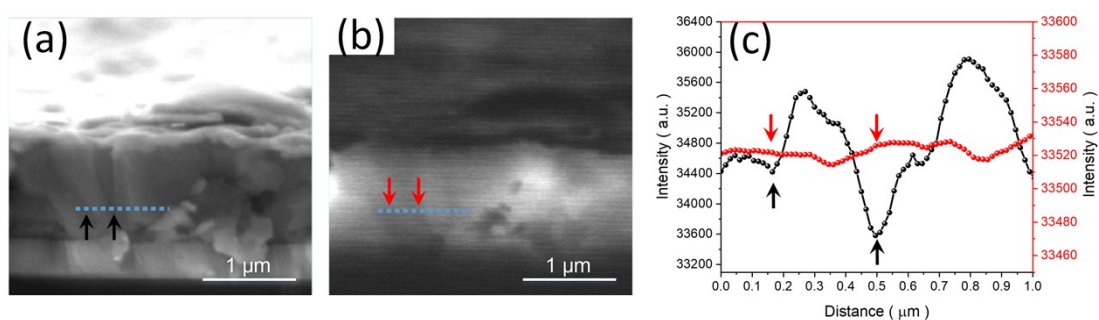

**Fig. S5** Cross-sectional SEM (a) and EBIC images (b) for the cleaved  $\text{Sb}_2\text{Se}_3$  devices without HTL. (c) The intensity profiling along the dashed blue line marked in panel (a) and (b).

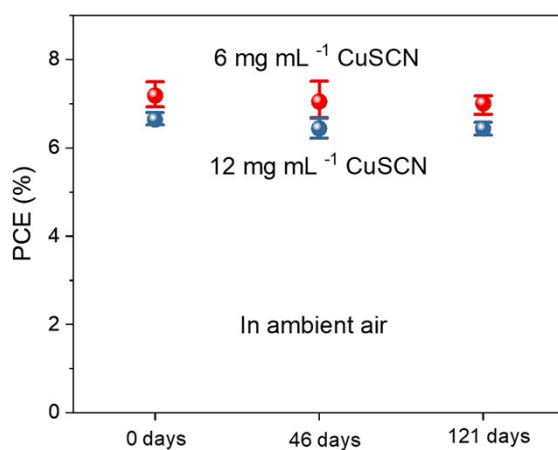

**Fig.S6** The stability of Sb<sub>2</sub>Se<sub>3</sub> devices with CuSCN as HTL, the red and blue symbol indicate the efficiency variation of devices with thin and thick CuSCN.

**Table S1** Hall measurement of CuSCN.

|      | Temperature<br>(K) | Bulk concentration<br>( cm <sup>-3</sup> ) | Mobility<br>(cm <sup>2</sup> V <sup>-1</sup> s <sup>-1</sup> ) |
|------|--------------------|--------------------------------------------|----------------------------------------------------------------|
| 1    | 300                | $2.82 \times 10^{18}$                      | 0.34                                                           |
| 2    | 300                | $1.80 \times 10^{18}$                      | 0.54                                                           |
| 3    | 300                | $1.63 \times 10^{18}$                      | 0.60                                                           |
| Mean | 300                | $2.08 \times 10^{18}$                      | 0.49                                                           |

**Table S2** Compared device performance before and after thermal treatment at 85 °C.

|      | $V_{oc}$<br>( mV ) | $J_{sc}$<br>( mA cm <sup>-2</sup> ) | $FF$<br>(%)     | $PCE$<br>(%)   |
|------|--------------------|-------------------------------------|-----------------|----------------|
| W/O  | $412 \pm 1.3$      | $30.1 \pm 0.41$                     | $58.1 \pm 0.89$ | $7.2 \pm 0.21$ |
| with | $423 \pm 1.5$      | $30.8 \pm 0.35$                     | $57.0 \pm 0.88$ | $7.4 \pm 0.25$ |

**Table S3** XPS element content of CuSCN on Sb<sub>2</sub>Se<sub>3</sub> before and after thermal treatment at 85 °C.

| Peak  | Peak BE | Atomic % |       |
|-------|---------|----------|-------|
|       |         | Before   | After |
| Cu 2p | 932.79  | 16.18    | 15.93 |
| N 1s  | 398.79  | 17.11    | 17.61 |
| C 1s  | 286.14  | 46.30    | 45.69 |
| S 2p  | 163.59  | 20.40    | 20.77 |
